# Supplementary material for: The transitivity of the Hardy–Weinberg law
Source: PubMed Central journal article supplement — Forensic Sci Int Genet. Author manuscript; Available in PMC 2023 Dec 3. (PMC10693928; doi:10.1016/j.fsigen.2022.102680), 2022-03-09
Supplement: NIHMS1945777-supplement-SupplemtaryMaterial.pdf [file NIHMS1945777-supplement-SupplemtaryMaterial.pdf]

388 **Supplementary tables**

| Allele | $p$   | $n$ | $p_{mid}$     | AA | AB | BB | $p_{mid}$     |
|--------|-------|-----|---------------|----|----|----|---------------|
| —      |       | 97  | 0.0285        |    |    |    |               |
| A11    | 0.201 | 63  | 0.0108        | 5  | 29 | 63 | 0.4357        |
| A12    | 0.005 | 96  | 0.0284        | 0  | 1  | 96 | 0.5000        |
| A14    | 0.010 | 95  | 0.0195        | 0  | 2  | 95 | 0.5026        |
| A15    | 0.309 | 49  | 0.1216        | 12 | 36 | 49 | 0.1950        |
| A16    | 0.227 | 55  | 0.0097        | 2  | 40 | 55 | 0.1141        |
| A17    | 0.222 | 64  | <b>0.3601</b> | 10 | 23 | 64 | <b>0.0042</b> |
| A18    | 0.021 | 93  | 0.0372        | 0  | 4  | 93 | 0.5155        |
| A19    | 0.005 | 96  | 0.0268        | 0  | 1  | 96 | 0.5000        |

Table S1: Allele frequency ( $p$ ), sample size ( $n$  individuals) and mid  $p$ -value of tests for HWP after deletion of an allele (first four columns) and after bi-allelification (last four columns: genotype counts and mid  $p$ -value) of the STR D22S1045 of the Asian sample.

| Allele | African American |     |     |               | Asian |    |    |               | Caucasian |     |     |               | Hispanic |     |     |               |
|--------|------------------|-----|-----|---------------|-------|----|----|---------------|-----------|-----|-----|---------------|----------|-----|-----|---------------|
|        | AA               | AB  | BB  | $p_{mid}$     | AA    | AB | BB | $p_{mid}$     | AA        | AB  | BB  | $p_{mid}$     | AA       | AB  | BB  | $p_{mid}$     |
| A8     | 0                | 5   | 337 | 0.5073        | —     | —  | —  | —             | —         | —   | —   | —             | —        | —   | —   | —             |
| A10    | 1                | 26  | 315 | 0.2692        | —     | —  | —  | —             | —         | —   | —   | —             | 0        | 7   | 229 | 0.5221        |
| A11    | 6                | 87  | 249 | 0.7454        | 5     | 29 | 63 | 0.4357        | 7         | 87  | 267 | 0.9135        | 1        | 28  | 207 | 0.8036        |
| A12    | 3                | 31  | 308 | 0.0385        | 0     | 1  | 96 | 0.5000        | 0         | 9   | 352 | 0.5246        | 0        | 6   | 230 | 0.5158        |
| A13    | 0                | 2   | 340 | 0.5007        | —     | —  | —  | —             | 0         | 5   | 356 | 0.5069        | 0        | 4   | 232 | 0.5064        |
| A14    | 1                | 51  | 290 | 0.5735        | 0     | 2  | 95 | 0.5026        | 0         | 41  | 320 | 0.4668        | 2        | 9   | 225 | 0.0047        |
| A15    | 23               | 126 | 193 | 0.6167        | 12    | 36 | 49 | 0.1950        | 36        | 160 | 165 | 0.7636        | 39       | 123 | 74  | 0.3198        |
| A16    | 20               | 91  | 231 | <b>0.0108</b> | 2     | 40 | 55 | 0.1141        | 44        | 188 | 129 | <b>0.0515</b> | 20       | 125 | 91  | <b>0.0123</b> |
| A17    | 13               | 117 | 212 | 0.5688        | 10    | 23 | 64 | <b>0.0042</b> | 2         | 50  | 309 | 0.8538        | 1        | 41  | 194 | 0.5605        |
| A18    | 0                | 10  | 332 | 0.5323        | 0     | 4  | 93 | 0.5155        | 0         | 4   | 357 | 0.5042        | 0        | 3   | 233 | 0.5032        |
| A19    | 0                | 4   | 338 | 0.5044        | 0     | 1  | 96 | 0.5000        | —         | —   | —   | —             | —        | —   | —   | —             |

Table S2: Bi-allelic exact tests results (exact mid  $p$ -values) for HWP for bi-allelified versions of D22S1045 for four ethnicities.
